# Supplementary material for: Multifunctional fibrous silica composite with high optical sensing performance and effective removal ability toward Hg2+ions
Source: Royal Society of Chemistry journal article supplement (doi:10.1039/c5tb00038f), 2015-01-01
Supplement: c5tb00038f1.pdf [file c5tb00038f1.pdf]

## Supplementary Material

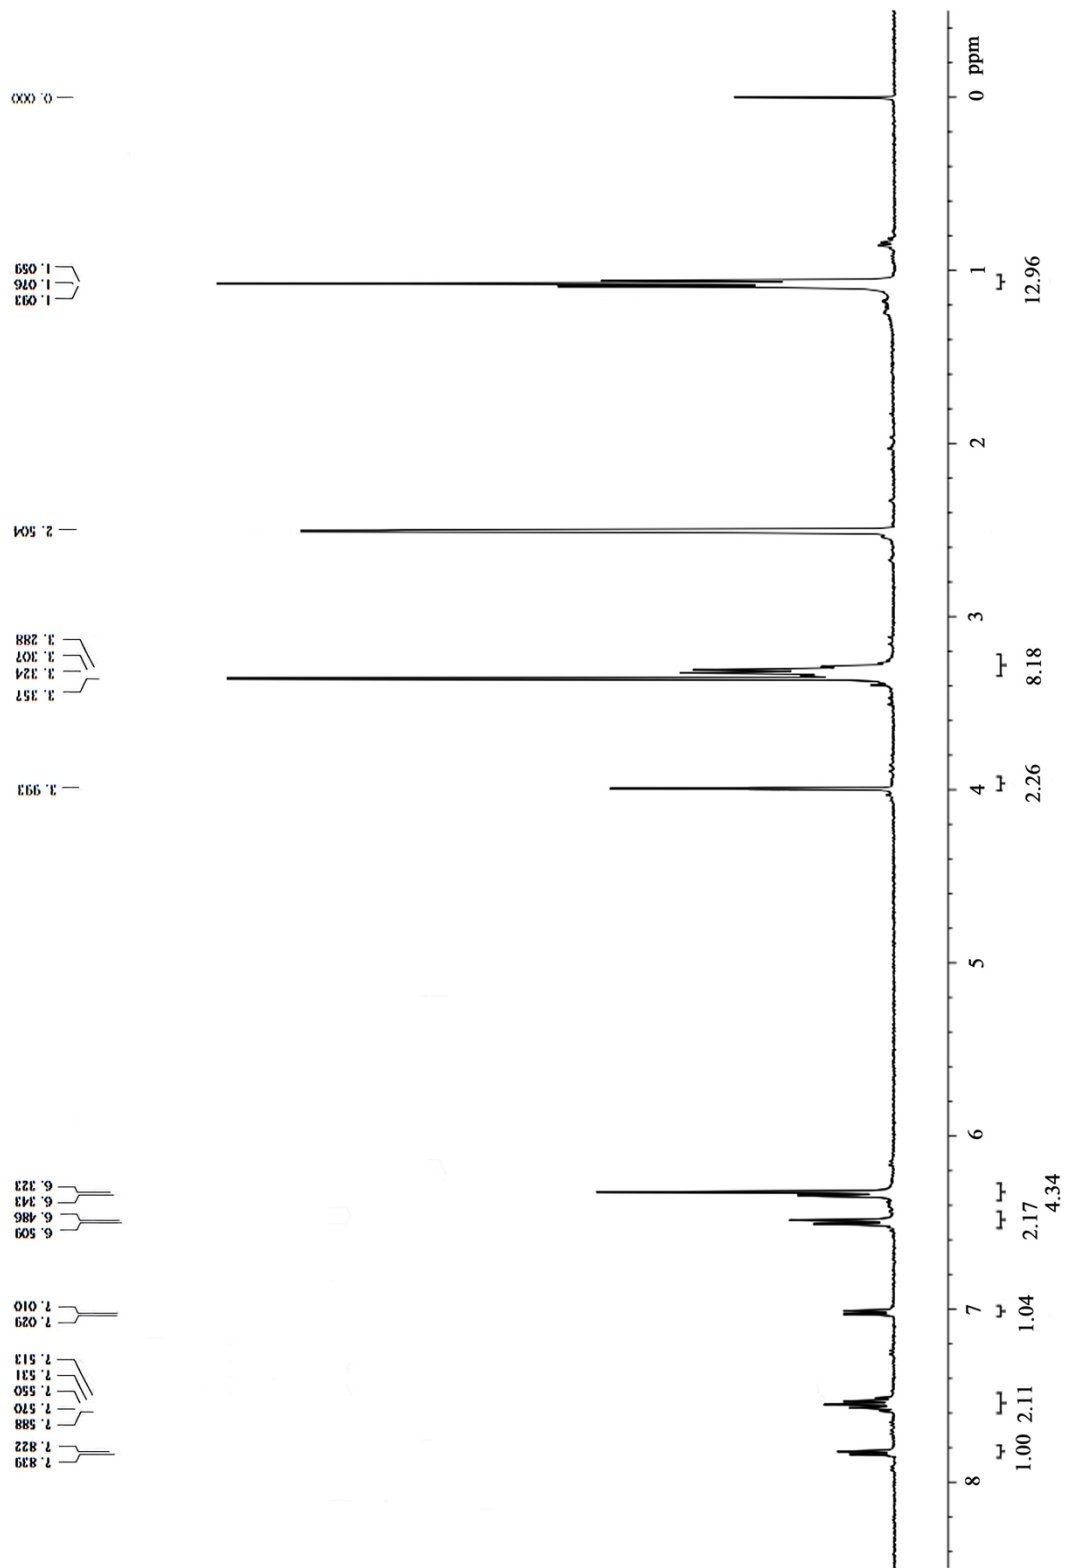

Fig. S1  $^1\text{H}$  NMR (DMSO, 400 MHz) spectrum of RB-Cl.

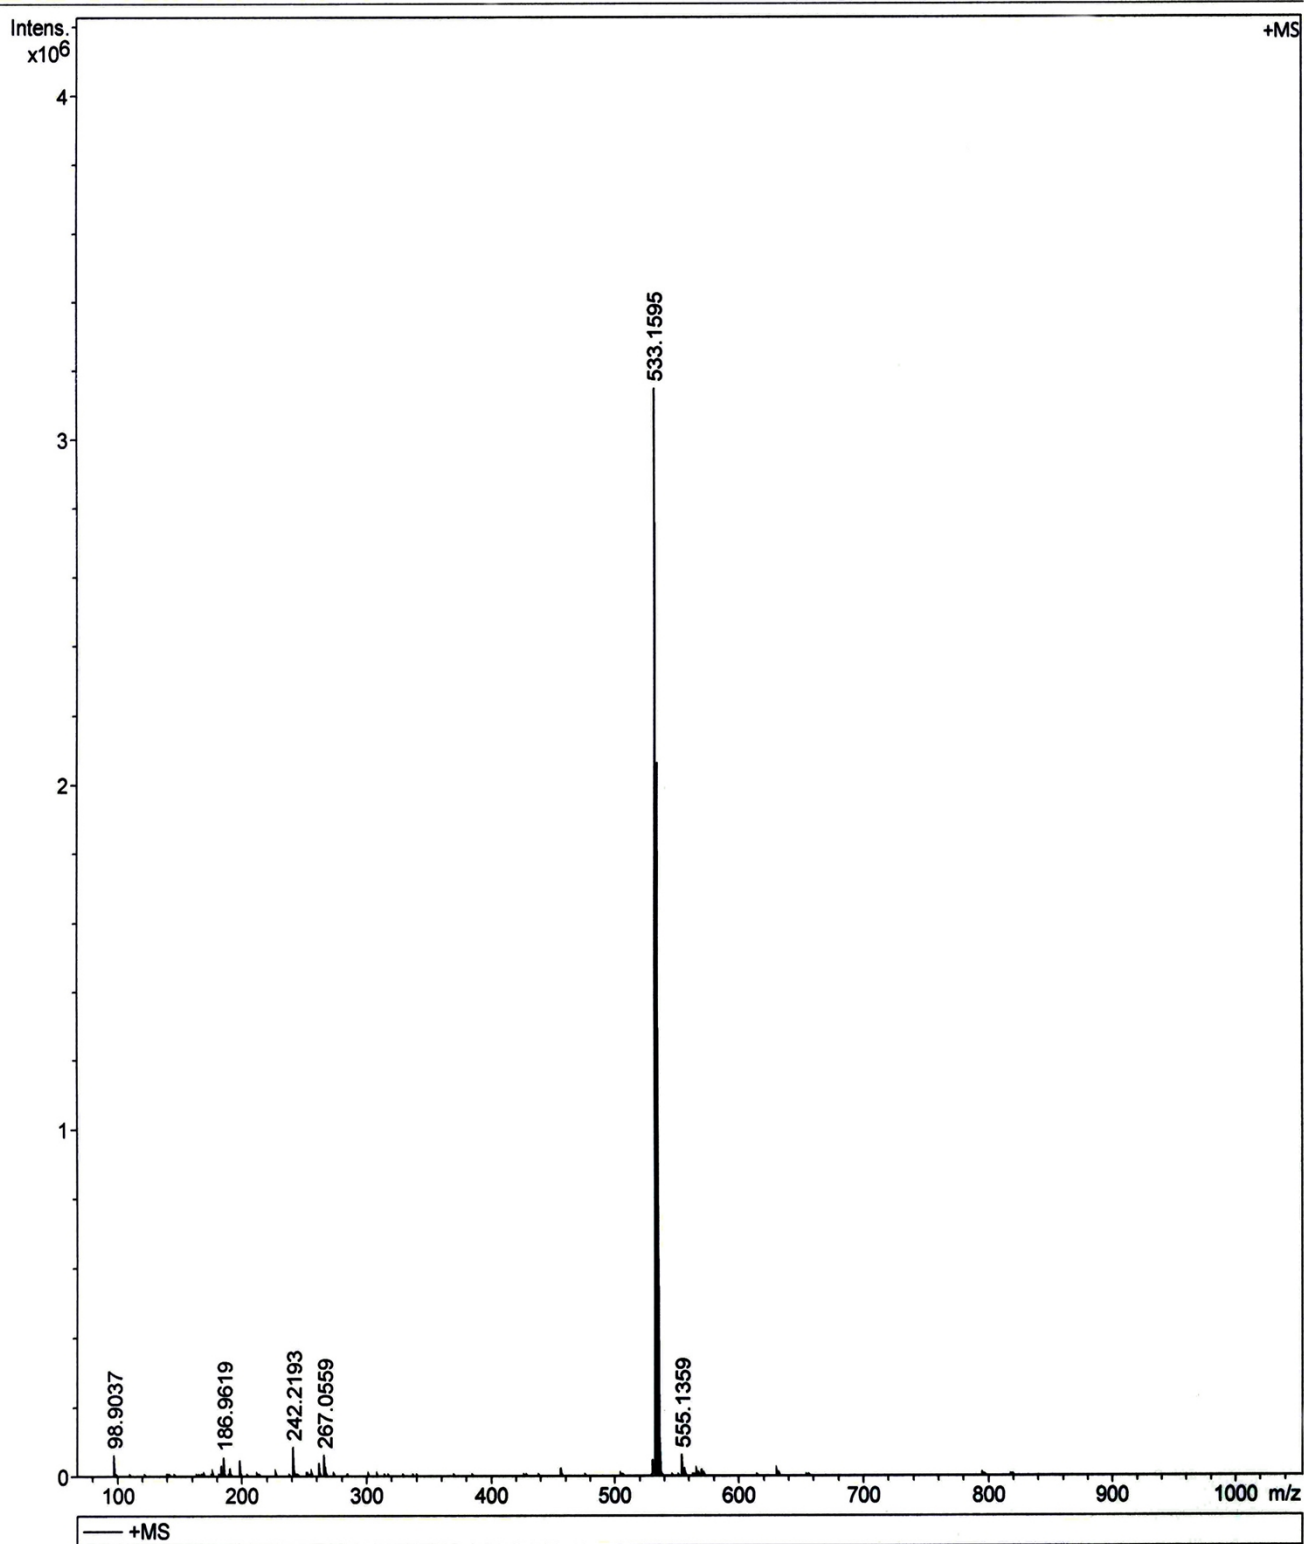

**Fig. S2** ESI-MS spectrum of RB-Cl.

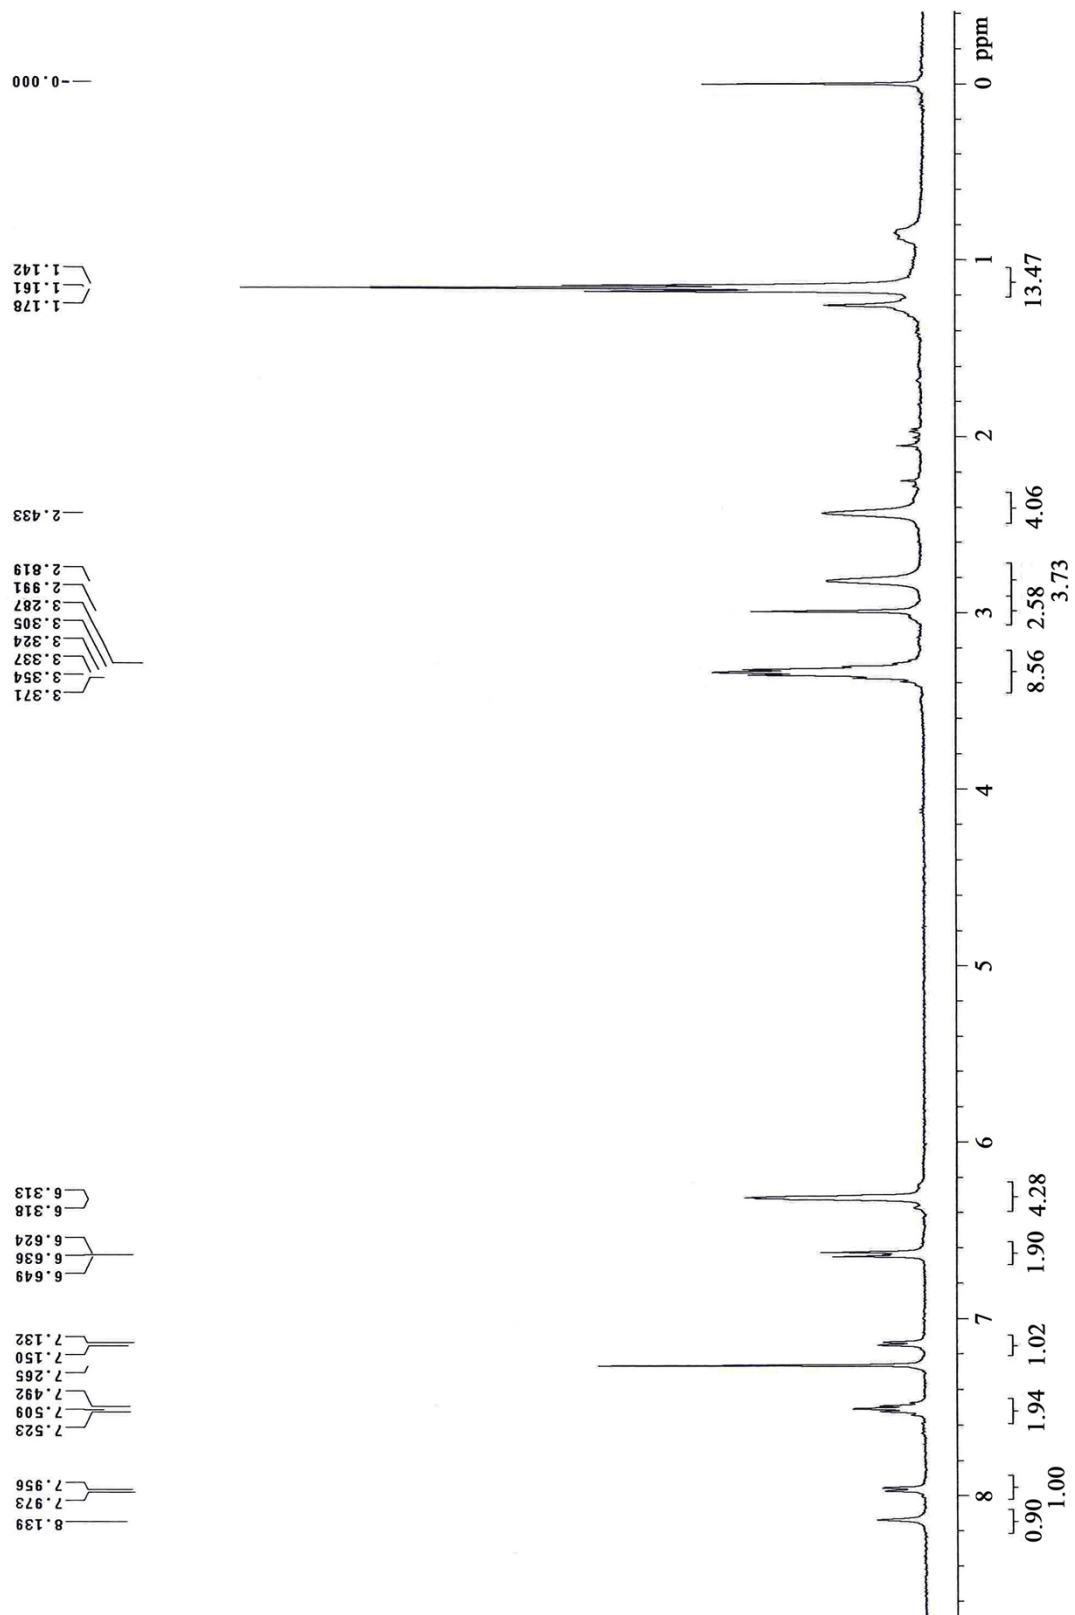

Fig. S3  $^1\text{H}$  NMR ( $\text{CDCl}_3$ , 400 MHz) spectrum of RB-N.

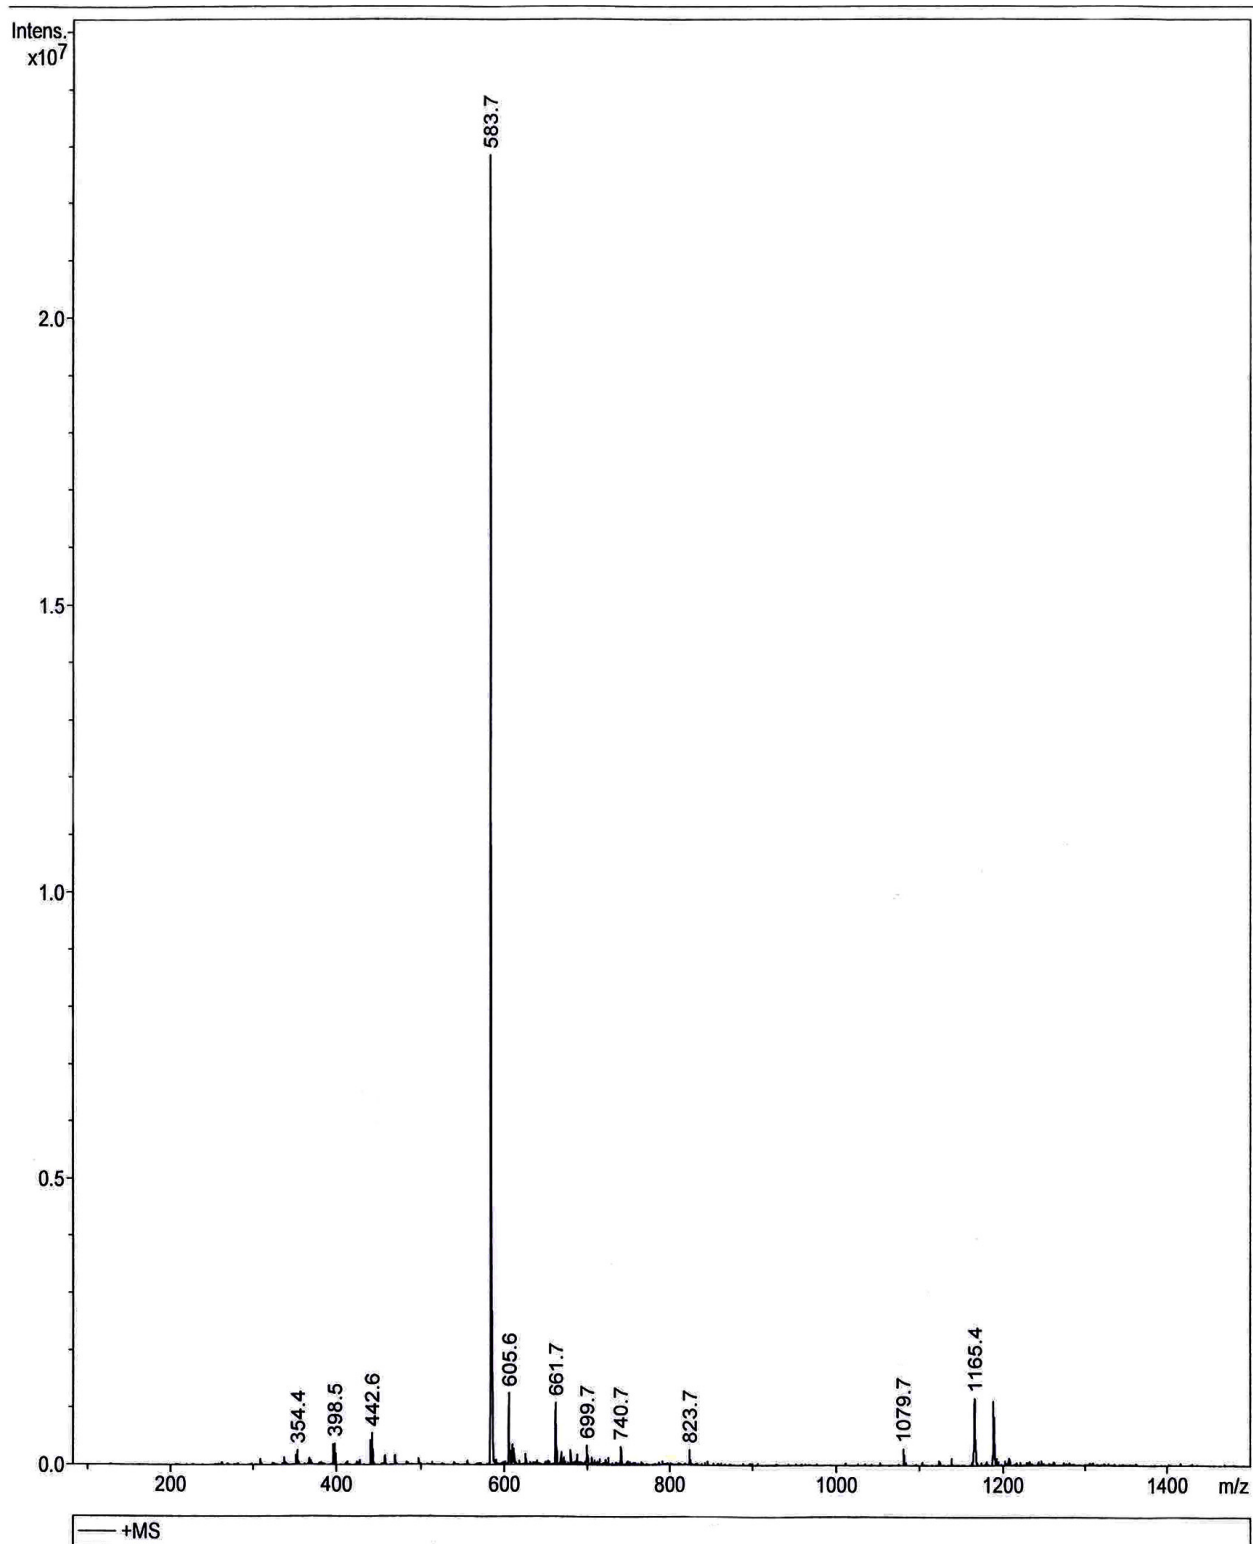

**Fig. S4** ESI-MS spectrum of RB-N.

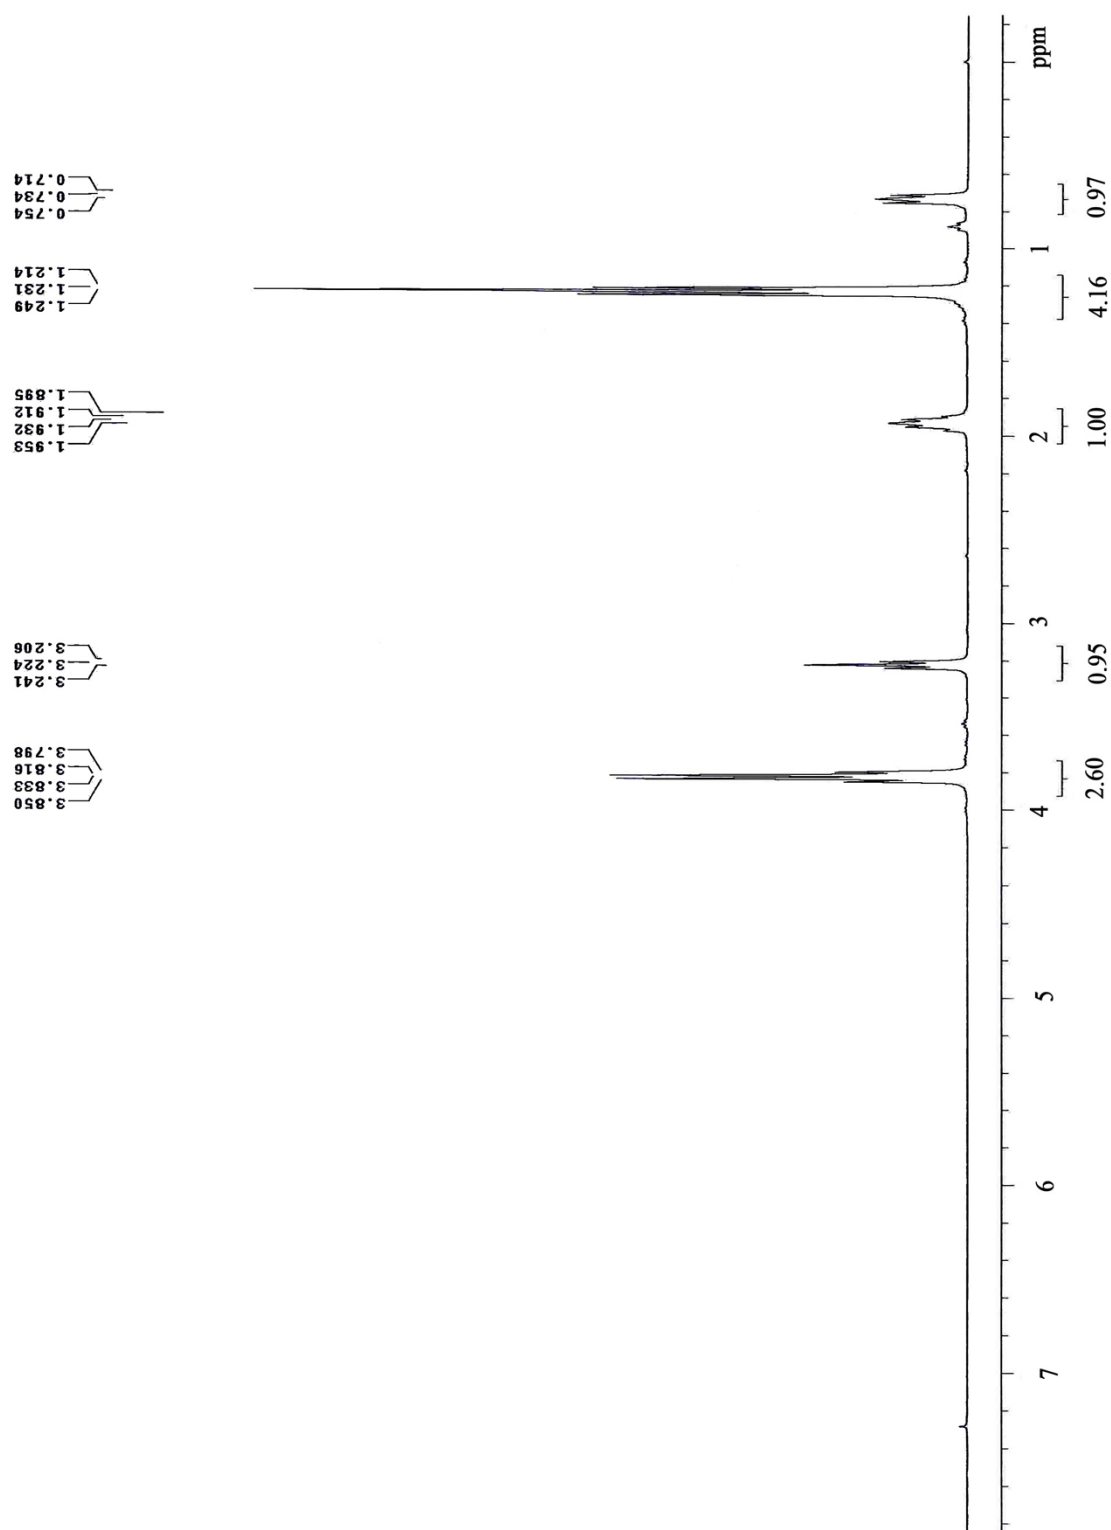

**Fig. S5**  $^1\text{H}$  NMR ( $\text{CDCl}_3$ , 400 MHz) spectrum of  $\text{ICH}_2\text{CH}_2\text{CH}_2\text{Si}(\text{OC}_2\text{H}_5)_3$

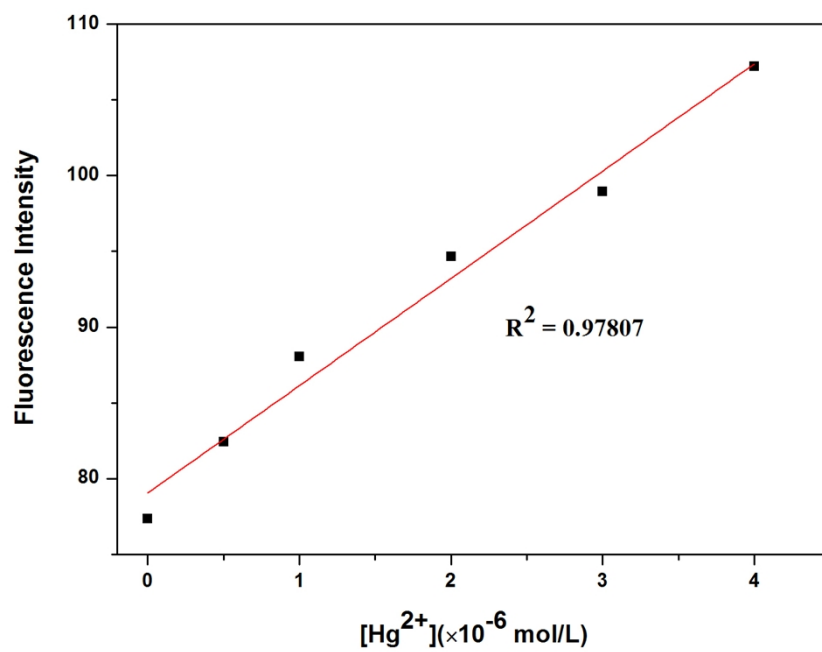

**Fig. S6** Linear fluorescence intensities of **RB-KCC-1** at 589 nm wavelength upon addition of  $\text{Hg}^{2+}$  (0-4  $\mu\text{M}$ ) in drinking water.

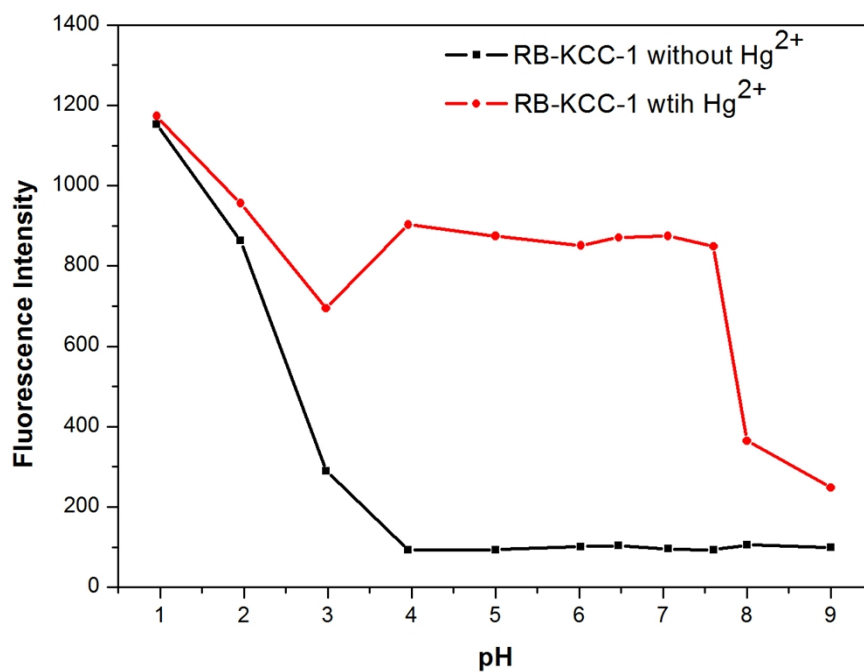

**Fig. S7** Fluorescence intensity of **RB-KCC-1** in ethanol/H<sub>2</sub>O (1/1, v/v) with and without Hg<sup>2+</sup> measured as a function of pH. Different pH values were achieved by varying the amount of 0.1 M NaOH/HCl added to the solution.  $\lambda_{\text{ex}} = 530 \text{ nm}$ ,  $\lambda_{\text{em}} = 589 \text{ nm}$ .



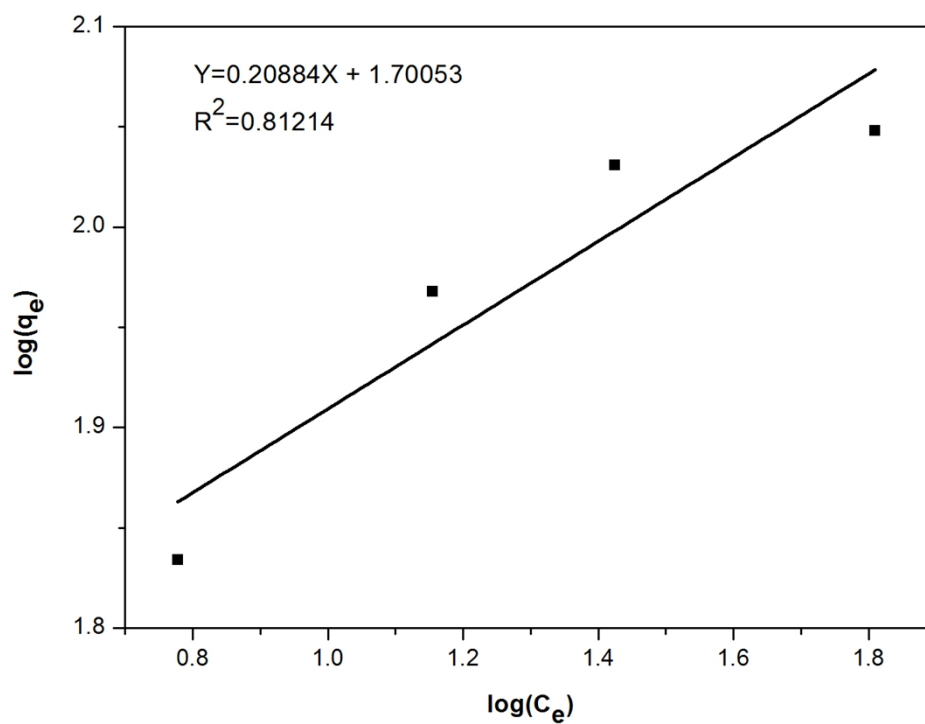

**Fig. S8** Freundlich adsorption isotherm plots for  $\text{Hg}^{2+}$  adsorption onto **RB-KCC-1**.

**Table S1.** Structural properties of KCC-1 and **RB-KCC-1**

| Samples         | $S_{\text{BET}}$ (m <sup>2</sup> /g) <sup>a</sup> | $D_{\text{BJH}}$ (nm) <sup>b</sup> | $V_t$ (cm <sup>3</sup> /g) <sup>c</sup> |
|-----------------|---------------------------------------------------|------------------------------------|-----------------------------------------|
| KCC-1           | 435                                               | 15.16                              | 1.49                                    |
| <b>RB-KCC-1</b> | 283                                               | 14.75                              | 0.99                                    |

<sup>a</sup> $S_{\text{BET}}$  : BET surface area calculated from data at  $P/P_0 = 0.06-0.29$ . <sup>b</sup> $D_{\text{BJH}}$  : the maximum of the Barret-Joyner-Hellenda (BJH) pore size distribution calculated from the desorption branch of the nitrogen isotherm. <sup>c</sup> $V_t$  : total pore volume calculated at  $P/P_0$  at 0.99.

**Table S2.** The parameters of Langmuir and Freundlich isotherms for Hg<sup>2+</sup> adsorption onto **RB-KCC-1**.

| Adsorption isotherm | parameter                            | <b>RB-KCC-1</b>    |                |
|---------------------|--------------------------------------|--------------------|----------------|
|                     |                                      | Value of parameter | R <sup>2</sup> |
| Langmuir            | K <sub>L</sub> (L mg <sup>-1</sup> ) | 0.4299             | 0.9948         |
|                     | q <sub>m</sub> (mg g <sup>-1</sup> ) | 115.4734           |                |
| Freundlich          | K <sub>F</sub> (L g <sup>-1</sup> )  | 50.1799            | 0.8121         |
|                     | n                                    | 4.7884             |                |
